# Supplementary material for: Detection and quantification of human immunodeficiency virus-1 (HIV-1) total nucleic acids in wastewater settled solids from two California communities
Source: bioRxiv or medRxiv preprint supplement (doi:10.1101/2024.03.12.24304178), 2024-03-13
Supplement: Supplementary file [file media-1.pdf]

1 **Supplemental material for**

2

3 **Detection and quantification of human immunodeficiency virus-1 (HIV-1) total nucleic**  
4 **acids in wastewater settled solids from two California communities**

5

6

7 Marlene K. Wolfe\*<sup>1</sup>, Bridgette Shelden<sup>2</sup>, Dorothea Duong<sup>2</sup>, Meri R.J. Varkila<sup>3</sup>, Bradley J. White,  
8 Julie Parsonnet<sup>3,4</sup>, Alexandria B. Boehm<sup>5</sup>

9

10 1. Gangarosa Department of Environmental Health, Rollins School of Public Health, Emory  
11 University, 1518 Clifton Rd, Atlanta, GA, USA, 30322

12 2. Verily Life Sciences LLC, South San Francisco, CA, USA

13 3. Division of Infectious Diseases and Geographic Medicine, Department of Medicine, Stanford  
14 University, 300 Pasteur Drive, Stanford, California, 94305

15 4. Department of Epidemiology and Population Health, Stanford University, 300 Pasteur Drive,  
16 Stanford, California, 94305

17 5. Department of Civil and Environmental Engineering, Stanford University, 473 Via Ortega,  
18 Stanford, California, 94305

19

20 \* Author to whom correspondence should be addresses: [marlene.wolfe@emory.edu](mailto:marlene.wolfe@emory.edu)

21

22

23 **Additional methods.** In California, healthcare providers and laboratories are required to report  
24 a confirmed HIV test to their local health jurisdiction. Specifically, data for Santa Clara County  
25 was obtained from the Santa Clara County Public Health “Sexually Transmitted Infections (STI)  
26 and HIV Epidemiology Annual Report”<sup>1,2</sup>. New HIV diagnoses are reported to Santa Clara  
27 County Public Health primarily from outpatient clinical settings, screening, diagnostic, and  
28 referral agencies, and inpatient clinical settings. The number of PLWH in the county is estimated  
29 based on people known to be living with HIV with a last known address in SCC, and the  
30 percentage of PLWH who are virally suppressed is based on the number of PLWH with a most  
31 recent viral load test less than 200 copies/ml in a given year. For San Francisco County, data  
32 was obtained from the San Francisco “HIV Epidemiology Annual Report” from the Department  
33 of Public Health, Population Health Division<sup>3,4</sup>. New HIV diagnoses are reported to San  
34 Francisco Public Health primarily through active surveillance of laboratory tests, pathology  
35 results and medical records. The number of PLWH in the county is estimated based on people  
36 know to be living with HIV with a last known address in San Francisco, and the percentage of  
37 PLWH who are virally suppressed is based on the number of PLWH with a most recent viral  
38 load test less than 200 copies/ml in the past 12 months.

39  
40  
41 **Additional details related to the EMMI guidelines.** Thirty-six samples from the retrospective  
42 study were selected at random for this analysis; this represents 8% of the samples processed in  
43 the study. As described in the methods section, each sample was run as template in two  
44 different PCR reactions; 1 for PMMoV, 1 for HIV-1, SARS-CoV-2, Influenza H1 gene, Influenza  
45 A N1 gene, West Nile Virus, Norovirus GII, human adenovirus group F, and rotavirus. The  
46 average (standard deviation) number of partitions (droplets) for each of the two reactions  
47 (across the 10 replicates) was 164164 (38851) for the reaction for PMMoV, 174321 (20126) for  
48 the reaction for HIV-1. The volume of the partitions, as reported by the machine vendor is  
49 0.00085  $\mu$ L. The mean and standard deviation of copies per partition for each target is shown in  
50 Table S3. Example fluorescent plots from the QX200 (two color reader) can be viewed in Topol  
51 et al. on protocols.io<sup>5</sup> and an example fluorescent plot from the QX600 (6 color reader) is  
52 included in the Stanford Digital Repository with the deposited data  
53 (<https://doi.org/10.25740/yz257qj0009>).

54  
55

56  
57  
58

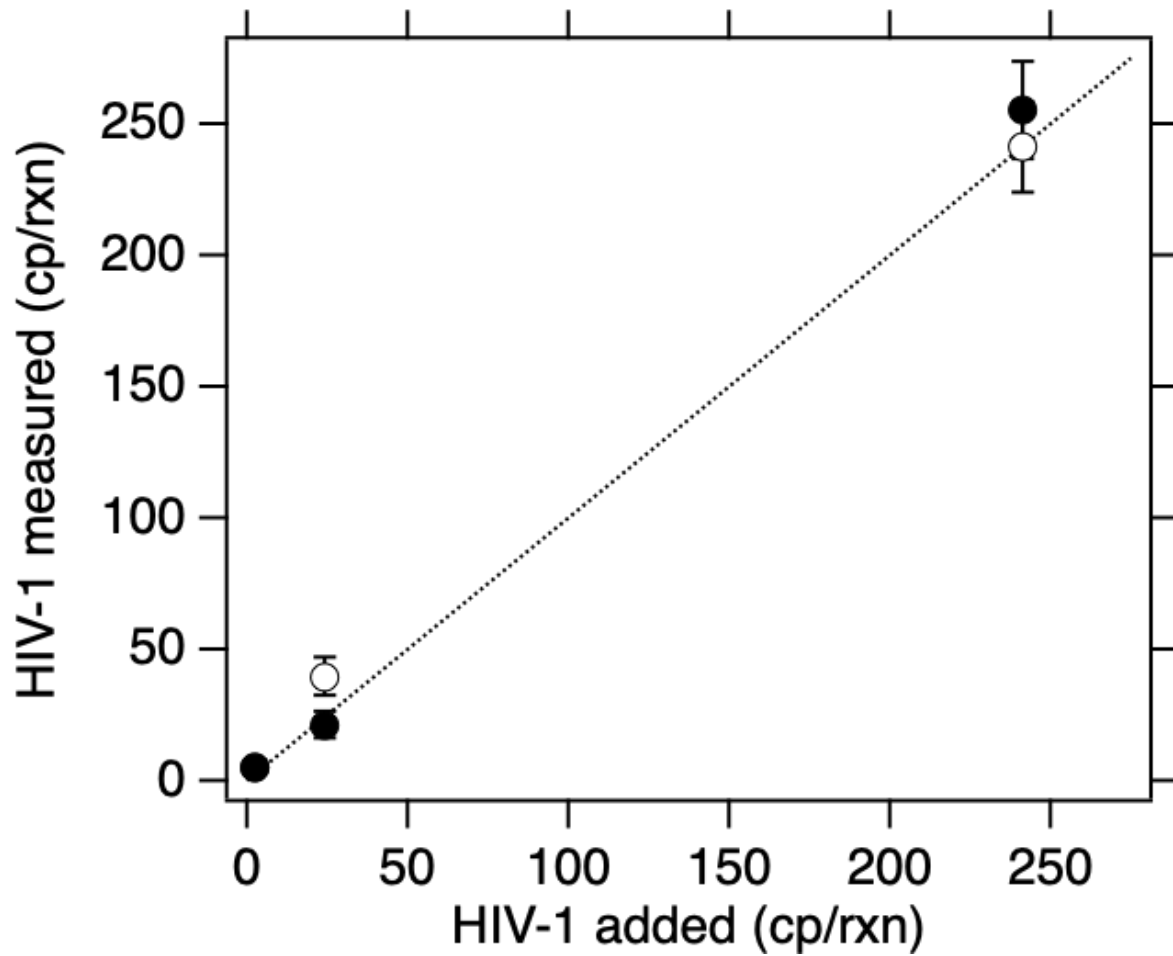

59  
60  
61  
62  
63  
64  
65  
66

**Figure S1. Multiplex assay performance.** The concentration of the HIV-1 target in units of copies per reaction input and measured is provided. The white symbols are for reactions without the 7 background nucleic-acid targets and black symbols include high concentrations of the 7 other nucleic-acid targets. Error bars are standard deviations, if error bars cannot be seen, then they are smaller than the symbol. The line represents the 1:1 line.

| Study Description                                                                                                                                                                                                                     | Environmental Sampling                                                                       | Sample Treatment                                  | Sample Reduction                                                                               | Nucleic-acid Extraction                                       | Reverse Transcription               | PCR Amplification                             | Analysis                                                    |
|---------------------------------------------------------------------------------------------------------------------------------------------------------------------------------------------------------------------------------------|----------------------------------------------------------------------------------------------|---------------------------------------------------|------------------------------------------------------------------------------------------------|---------------------------------------------------------------|-------------------------------------|-----------------------------------------------|-------------------------------------------------------------|
| HIV-1 in wastewater<br>Sep-23<br>Alexandra Boehm                                                                                                                                                                                      | Notes: Described in methods section. Same samples used in other publications which are cited | Notes: None                                       | Notes: Centrifugation and the resuspension of solids in a buffer, described in methods section | Notes: Described in methods section                           | Notes: Described in methods         | Notes: Provided in the methods section.       | Notes: Details of analysis provided in the methods section. |
| Control Checklist                                                                                                                                                                                                                     | Environmental Sampling                                                                       | Sample Treatment                                  | Sample Reduction                                                                               | Nucleic-acid Extraction                                       | Reverse Transcription               | PCR Amplification                             |                                                             |
| Step performed                                                                                                                                                                                                                        | <input checked="" type="checkbox"/>                                                          | <input type="checkbox"/>                          | <input checked="" type="checkbox"/>                                                            | <input checked="" type="checkbox"/>                           | <input checked="" type="checkbox"/> | <input checked="" type="checkbox"/>           |                                                             |
| Step has control info                                                                                                                                                                                                                 | <input type="checkbox"/>                                                                     | <input type="checkbox"/>                          | <input type="checkbox"/>                                                                       | <input checked="" type="checkbox"/>                           | <input checked="" type="checkbox"/> | <input type="checkbox"/>                      | Negative controls                                           |
| # of control replicates                                                                                                                                                                                                               | 0                                                                                            |                                                   | 0                                                                                              | 3                                                             | 3                                   | na                                            |                                                             |
| Control result reported                                                                                                                                                                                                               | <input type="checkbox"/>                                                                     | <input type="checkbox"/>                          | <input type="checkbox"/>                                                                       | <input checked="" type="checkbox"/>                           | <input checked="" type="checkbox"/> | <input type="checkbox"/>                      |                                                             |
| Method for handling failed controls described                                                                                                                                                                                         | <input type="checkbox"/>                                                                     | <input type="checkbox"/>                          | <input type="checkbox"/>                                                                       | <input checked="" type="checkbox"/>                           | <input checked="" type="checkbox"/> | <input type="checkbox"/>                      |                                                             |
| Step has control info                                                                                                                                                                                                                 | <input checked="" type="checkbox"/>                                                          | <input type="checkbox"/>                          | <input type="checkbox"/>                                                                       | <input checked="" type="checkbox"/>                           | <input checked="" type="checkbox"/> | <input type="checkbox"/>                      | Positive controls                                           |
| Control identity described                                                                                                                                                                                                            | <input checked="" type="checkbox"/>                                                          | <input type="checkbox"/>                          | <input type="checkbox"/>                                                                       | <input checked="" type="checkbox"/>                           | <input checked="" type="checkbox"/> | <input type="checkbox"/>                      |                                                             |
| Control quantification method described                                                                                                                                                                                               | <input type="checkbox"/>                                                                     | <input type="checkbox"/>                          | <input type="checkbox"/>                                                                       | <input checked="" type="checkbox"/>                           | <input checked="" type="checkbox"/> | <input type="checkbox"/>                      |                                                             |
| # control replicates                                                                                                                                                                                                                  | endogenous                                                                                   |                                                   | 0                                                                                              | 1                                                             | 1                                   | na                                            |                                                             |
| Control result reported                                                                                                                                                                                                               | <input checked="" type="checkbox"/>                                                          | <input type="checkbox"/>                          | <input type="checkbox"/>                                                                       | <input checked="" type="checkbox"/>                           | <input checked="" type="checkbox"/> | <input type="checkbox"/>                      |                                                             |
| Method for handling failed controls described                                                                                                                                                                                         | <input checked="" type="checkbox"/>                                                          | <input type="checkbox"/>                          | <input type="checkbox"/>                                                                       | <input checked="" type="checkbox"/>                           | <input checked="" type="checkbox"/> | <input type="checkbox"/>                      |                                                             |
| Process checklist                                                                                                                                                                                                                     |                                                                                              |                                                   |                                                                                                |                                                               |                                     |                                               |                                                             |
| Environmental Sampling                                                                                                                                                                                                                | <input checked="" type="checkbox"/>                                                          | Nucleic-acid Extraction                           | <input checked="" type="checkbox"/>                                                            | qPCR or dPCR                                                  | <input checked="" type="checkbox"/> | Analysis- dPCR                                | <input checked="" type="checkbox"/>                         |
| Sample procedure                                                                                                                                                                                                                      | <input checked="" type="checkbox"/>                                                          | Extraction procedure                              | <input checked="" type="checkbox"/>                                                            | Target gene name, amplicon length                             | <input checked="" type="checkbox"/> | Threshold settings                            | <input checked="" type="checkbox"/>                         |
| Number of samples                                                                                                                                                                                                                     | <input checked="" type="checkbox"/>                                                          | Volume or mass extracted, volume or mass obtained | <input checked="" type="checkbox"/>                                                            | Thermocycling temp and times                                  | <input checked="" type="checkbox"/> | Technical replicates, number, well merging    | <input checked="" type="checkbox"/>                         |
| Sample amount, mean, range                                                                                                                                                                                                            | <input checked="" type="checkbox"/>                                                          | Extract storage conditions                        | <input checked="" type="checkbox"/>                                                            | Master mix composition: vendors, concentrations               | <input checked="" type="checkbox"/> | Partitions measured, number, mean, variance   | <input checked="" type="checkbox"/>                         |
| Sampling locations, dates, times                                                                                                                                                                                                      | <input checked="" type="checkbox"/>                                                          | Reverse Transcription                             |                                                                                                | Additive: vendors, composition                                | <input checked="" type="checkbox"/> | Partition volume                              | <input checked="" type="checkbox"/>                         |
| Sample storage conditions                                                                                                                                                                                                             | <input checked="" type="checkbox"/>                                                          | One- or two-step                                  | <input checked="" type="checkbox"/>                                                            | Template amount added, pre-treatment (if any)                 | <input checked="" type="checkbox"/> | Target copies per partition, mean, variance   | <input checked="" type="checkbox"/>                         |
| Sample Treatment                                                                                                                                                                                                                      |                                                                                              | cDNA storage conditions (if 2 step)               | <input type="checkbox"/>                                                                       | Primers: sequences, concentrations, vendors, references       | <input checked="" type="checkbox"/> | Program used for dPCR analysis                | <input checked="" type="checkbox"/>                         |
| Treatment procedure                                                                                                                                                                                                                   | <input type="checkbox"/>                                                                     | Reaction temperatures and times                   | <input checked="" type="checkbox"/>                                                            | Amplicon confirmation method (probe, melt curve details, etc) | <input checked="" type="checkbox"/> | Explanation of control results, example plots | <input checked="" type="checkbox"/>                         |
| Reagents                                                                                                                                                                                                                              | <input type="checkbox"/>                                                                     | Reaction reagents and concentrations              | <input checked="" type="checkbox"/>                                                            | Probe sequences, concentration, vendor, reference             | <input checked="" type="checkbox"/> | Analysis- qPCR                                |                                                             |
| Sample Reduction                                                                                                                                                                                                                      |                                                                                              | Priming method                                    | <input checked="" type="checkbox"/>                                                            | Instrumentation                                               | <input checked="" type="checkbox"/> | Technical replicates, number, calculations    | <input type="checkbox"/>                                    |
| Reduction procedure                                                                                                                                                                                                                   | <input checked="" type="checkbox"/>                                                          | Reaction volume, added template amount            | <input checked="" type="checkbox"/>                                                            | Inhibition assessment procedure                               | <input type="checkbox"/>            | Calibration standards, description, source    | <input type="checkbox"/>                                    |
| Reagents                                                                                                                                                                                                                              | <input type="checkbox"/>                                                                     | RT efficiency assessment procedure (if 2-step)    | <input type="checkbox"/>                                                                       | Inhibition control description (if used)                      | <input type="checkbox"/>            | Method of quantifying standards               | <input type="checkbox"/>                                    |
| Concentration factor                                                                                                                                                                                                                  | <input checked="" type="checkbox"/>                                                          | RT control description (if two-step)              | <input type="checkbox"/>                                                                       | Number of samples tested and found inhibited                  | <input type="checkbox"/>            | Calibration curve slope                       | <input type="checkbox"/>                                    |
|                                                                                                                                                                                                                                       |                                                                                              | RT efficiency reported (if 2-step)                | <input type="checkbox"/>                                                                       |                                                               |                                     | Calibration curve R2                          | <input type="checkbox"/>                                    |
|                                                                                                                                                                                                                                       |                                                                                              |                                                   |                                                                                                |                                                               |                                     | Lowest standard measured or 95% LOD           | <input type="checkbox"/>                                    |
|                                                                                                                                                                                                                                       |                                                                                              |                                                   |                                                                                                |                                                               |                                     | Cq value determination methods                | <input type="checkbox"/>                                    |
| Note to users: This checklist is provided as guidance for best practices for reporting, but is not meant to be prescriptive. Not all items in the check list will apply to all studies. Please see Borchardt et al. The Environmental |                                                                                              |                                                   |                                                                                                |                                                               |                                     |                                               |                                                             |
| Version 2.0                                                                                                                                                                                                                           |                                                                                              |                                                   |                                                                                                |                                                               |                                     |                                               |                                                             |
| This version maintained by Borchardt, Boehm, Salt, Nobile, Wigginton, Spencer                                                                                                                                                         |                                                                                              |                                                   |                                                                                                |                                                               |                                     |                                               |                                                             |
| Date: 4 August 2023                                                                                                                                                                                                                   |                                                                                              |                                                   |                                                                                                |                                                               |                                     |                                               |                                                             |

67  
68 **Figure S2. EMMI<sup>6</sup> checklist.**  
69  
70

71  
72

**Table S1. Sample collection details.**

| Wastewater plant | Dates of contemporaneous collection of liquids and solids | Dates of solids collection for analysis with and without RT step |
|------------------|-----------------------------------------------------------|------------------------------------------------------------------|
| OSP              | July 11, 13-16, 17, 18, and 21, 2023 (n=8)                | July 11, 13-16, 18, 19, 21, 2023 (n=9)                           |
| SEP              | July 10-16, and 18, 2023 (n=8)                            | July 10-18, 2023 (n=9)                                           |

73  
74  
75  
76  
77  
78

**Table S2. Primers and probes for PMMoV.** Probes indicate which fluorescent molecular was used as well as the quencher. HEX, hexachloro-fluorescein;; ZEN, a proprietary internal quencher from Integrated DNA Technologies (Coralville, IA, USA); and IBFQ, Iowa Black FQ.

| Target | Primer/Probe | Sequence                              |
|--------|--------------|---------------------------------------|
| PMMoV  | Forward      | GAGTGGTTTGACCTTAACGTTTGA              |
|        | Reverse      | TTGTCGGTTGCAATGCAAGT                  |
|        | Probe        | CCTACCGAAGCAAATG (5' HEX/ZEN/3' IBFQ) |

79  
80

**Table S3. Additional details related to the EMMI guidelines.** For each target measured in this study, the mean and standard deviation (sd) of the total number of copies of target per partition. Num is the number of samples out of a random 36 included in this analysis that had detectable target in them and thus contributed to the calculated mean and standard deviation.

| Target | HIV-1  | PMMoV |
|--------|--------|-------|
| mean   | 0.0002 | 0.15  |
| sd     | 0.0003 | 0.069 |
| num    | 18     | 36    |

85

86  
87  
88  
89  
90  
91  
92  
93  
94  
95  
96  
97  
98  
99  
100  
101  
102  
103  
104  
105  
106  
107  
108  
109  
110  
111  
112

References

- (1) *Sexually Transmitted Infections (STI) and HIV Epidemiology Annual Report, 2022*; County of Santa Clara Public Health Department Infectious Disease and Response Branch, 2023. [https://publichealth.sccgov.org/sites/g/files/exjcpb916/files/documents/STIHIV\\_AnnualReport\\_2022.pdf](https://publichealth.sccgov.org/sites/g/files/exjcpb916/files/documents/STIHIV_AnnualReport_2022.pdf) (accessed 2024-03-10).
- (2) *Sexually Transmitted Infections (STI) and HIV Epidemiology Annual Report, 2021*; County of Santa Clara Public Health Department Infectious Disease and Response Branch, 2023. [https://publichealth.sccgov.org/sites/g/files/exjcpb916/files/documents/STIHIV\\_AnnualReport\\_2021.pdf](https://publichealth.sccgov.org/sites/g/files/exjcpb916/files/documents/STIHIV_AnnualReport_2021.pdf) (accessed 2024-03-10).
- (3) *HIV Epidemiology Annual Report 2021*; San Francisco Department of Public Health Population Health Division HIV Epidemiology Section, 2022. <https://www.sfdph.org/dph/files/reports/RptsHIVAIDS/AnnualReport2021-Red.pdf> (accessed 2024-03-10).
- (4) *HIV Epidemiology Annual Report 2022*; San Francisco Department of Public Health Population Health Division HIV Epidemiology Section, 2023. <https://www.sfdph.org/dph/files/reports/RptsHIVAIDS/AnnualReport2022-Orange.pdf> (accessed 2024-03-10).
- (5) Topol, A.; Wolfe, M.; White, B.; Wigginton, K.; Boehm, A. High Throughput SARS-COV-2, PMMOV, and BCoV Quantification in Settled Solids Using Digital RT-PCR. *protocols.io* **2021**. <https://doi.org/dx.doi.org/10.17504/protocols.io.btywnpxe>.
- (6) Borchardt, M. A.; Boehm, A. B.; Salit, M.; Spencer, S. K.; Wigginton, K. R.; Noble, R. T. The Environmental Microbiology Minimum Information (EMMI) Guidelines: qPCR and dPCR Quality and Reporting for Environmental Microbiology. *Environ. Sci. Technol.* **2021**, *55* (15), 10210–10223. <https://doi.org/10.1021/acs.est.1c01767>.
